# Supplementary material for: Auxiliary ligand-directed synthesis of a series of Cd(ii)/Co(ii) coordination polymers with methylenebis(3,5-dimethylpyrazole): syntheses, crystal structures, and properties
Source: Royal Society of Chemistry journal article supplement (doi:10.1039/c3dt51574e), 2013-01-01
Supplement: c3dt51574e.pdf [file c3dt51574e.pdf]

**Auxiliary Ligand-Directed Synthesis of a Series of Cd(II)/Co(II)  
Coordination Polymers with Methylenebis(3,5-dimethylpyrazole):  
Syntheses, Crystal Structures, and Properties**

*Xiang-Guang Guo, Wen-Bin Yang, Xiao-Yuan Wu, Qi-Kai Zhang, Lang Lin, RongMin Yu, Hui-Fen Chen, and Can-Zhong Lu\**

*State Key Laboratory of Structural Chemistry, Fujian Institute of Research on the Structure of Matter, Chinese Academy of Sciences, Fuzhou, Fujian 35002, China.*

## Experimental

### Materials and measurements

Methylene bis(3,5-dimethylpyrazole) (H<sub>2</sub>MDP) was prepared according to previously described methods<sup>1</sup> and other reagents and chemicals were purchased commercially and used as received without further purification. Elemental analyses (C, H, N) were performed on a Vario EL III elemental analyzer. Infrared spectra were measured as KBr disks on were on a Spectrum-One FT-IR Spectrophotometer. X-ray powder diffraction data were collected on a Miniflex2 diffractometer with Cu-K $\alpha$  radiation ( $\lambda=1.54184 \text{ \AA}$ ) and scans were run for each sample over the range  $5^\circ \leq 2\theta \leq 65^\circ$ . Thermal gravimetric analyses were performed on a NETSCHZ STA-449C thermoanalyzer at a heating rate of 10°C/min under nitrogen atmosphere. Magnetic data were obtained with a Quantum Design MPMS XL SQUID magnetometer. Fluorescence spectra were measured with an Edinburgh Analytical instrument FLS920.

### Preparation of the compounds 1–6

#### $\{\{\text{Cd}(\text{H}_2\text{MDP})(\text{OPh})(\text{H}_2\text{O})\}_n\}$ (**1**)

A mixture of Cd(NO<sub>3</sub>)<sub>2</sub>·4H<sub>2</sub>O (0.2 mmol, 60 mg), H<sub>2</sub>MDP (0.2 mmol, 40 mg), H<sub>2</sub>Oph (0.2 mmol, 33 mg), and H<sub>2</sub>O (10 mL) was sealed in a 25 mL Teflon-lined bombs, heated at 130°C for 72 h, and then cooled slowly at 2 °C/h to room temperature, affording pale yellow lamellar crystals of **1** in 71% yield (based on H<sub>2</sub>MDP). Anal. Calcd for C<sub>19</sub>H<sub>22</sub>CdN<sub>4</sub>O<sub>5</sub>: C, 45.71; N, 11.23; H, 4.41. Found: C, 45.63; N, 11.28, H, 4.49. IR (KBr, cm<sup>-1</sup>): 3235 (m), 1548 (s), 1401 (s), 1285 (m), 856 (m), 752 (w), 648 (w).

#### $\{\{\text{Cd}(\text{H}_2\text{MDP})(\text{MPh})(\text{H}_2\text{O})_{1/10}\}_n\}$ (**2**)

Yellow block crystals of **2** were obtained through a procedure similar to that of **1** except using H<sub>2</sub>MPh instead of H<sub>2</sub>Oph (48% yield based on H<sub>2</sub>MDP). Anal. Calcd for C<sub>19</sub>H<sub>20.2</sub>CdN<sub>4</sub>O<sub>4.1</sub>: C, 47.24; N, 11.60; H, 4.18. Found: C, 47.07; N, 11.72, H, 4.21. IR (KBr, cm<sup>-1</sup>): 3192 (w), 1608 (m), 1556 (m), 1357 (m), 890 (w), 752 (m), 719 (m), 658 (w).

#### $\{\{\text{Cd}(\text{H}_2\text{MDP})(\text{PPh})(\text{H}_2\text{O})_{3/2}\}_n\}$ (**3**)

Colorless block crystals of **3** were obtained through a procedure similar to that of **1** except using H<sub>2</sub>PPh instead of H<sub>2</sub>Oph (56 % based on H<sub>2</sub>MDP). Anal. Calcd for C<sub>19</sub>H<sub>23</sub>CdN<sub>4</sub>O<sub>5.50</sub>: C, 44.90; N, 11.02; H, 4.53. Found: C, 44.74; N, 10.97, H, 4.58. IR (KBr, cm<sup>-1</sup>): 3349 (m), 1542 (m), 1381 (s), 839 (m), 732 (m), 615 (w).

#### $\{\{\text{Co}(\text{H}_2\text{MDP})(\text{OPh})(\text{H}_2\text{O})_2\}_n\}$ (**4**)

Purple rod crystals of **4** were obtained in moderate yields (63% based on H<sub>2</sub>MDP) by a similar method as described for **1**, except using the corresponding Co(OAc)<sub>2</sub>·4H<sub>2</sub>O (0.25 mmol, 62 mg) instead of Cd(NO<sub>3</sub>)<sub>2</sub>·4H<sub>2</sub>O. Anal. Calcd for C<sub>19</sub>H<sub>24</sub>CoN<sub>4</sub>O<sub>6</sub>: C, 49.21; N, 12.09; H, 5.18. Found: C, 49.40; N, 11.93, H, 5.13. IR (KBr, cm<sup>-1</sup>): 3265 (m), 1560 (m), 1392 (m), 874 (w), 832 (w), 760 (w), 702 (w), 660 (w).

#### $\{\{\text{Co}(\text{H}_2\text{MDP})(\text{MPh})\}_n\}$ (**5**)

A mixture of Co(NO<sub>3</sub>)<sub>2</sub>·6H<sub>2</sub>O (0.2 mmol, 59 mg), H<sub>2</sub>MDP (0.2 mmol, 40 mg), H<sub>2</sub>MPh (0.2 mmol, 33 mg), KOH (0.36 mmol, 20 mmg), and H<sub>2</sub>O (10 mL) was placed in a 25 mL Teflon-lined stainless steel autoclave. The autoclave was sealed, heated to 160 °C in 2 h, and held at the temperature for 72 h. After the mixture had slowly cooled to room temperature at 3 °C/h, purple block crystals of **5** were obtained in 69% yield (based on the H<sub>2</sub>MDP). Anal. Calcd for C<sub>19</sub>H<sub>20</sub>CoN<sub>4</sub>O<sub>4</sub>: C, 53.36; N, 13.10; H, 4.68. Found: C, 53.23; N, 12.92, H, 4.58. IR (KBr, cm<sup>-1</sup>): 3204 (m), 1618 (s), 1560 (s), 1430 (m), 1360 (s), 806 (w), 737 (m), 702 (m), 660 (w).

#### $\{\{\text{Co}(\text{H}_2\text{MDP})(\text{HBTC})\}_n\}$ (**6**)

A mixture of CoCl<sub>2</sub>·6H<sub>2</sub>O (0.25 mmol, 59 mg), H<sub>2</sub>MDP (0.2 mmol, 40 mg), H<sub>3</sub>BTC (0.2 mmol, 42 mg), and H<sub>2</sub>O (10 mL) was placed in a 25 mL Teflon-lined stainless steel autoclave. The autoclave was heated at 160°C for 72 h, and then cooled slowly at 3°C/h to room temperature, affording purple lamellar crystals of **6** in 41% yield (based on H<sub>2</sub>MDP). Anal. Calcd for C<sub>20</sub>H<sub>20</sub>CoN<sub>4</sub>O<sub>6</sub>: C, 50.92; N, 11.88; H, 4.24. Found: C, 50.76; N, 11.96, H, 4.33. IR (KBr, cm<sup>-1</sup>): 3209 (w), 1695 (s), 1627 (m), 1587 (m), 1350 (s), 1262 (m), 896 (w), 760 (m), 714 (m), 683 (m), 628 (w).

### IR and Thermal Analyses

For compounds **1-5**, the absence of strong absorption bands around 1700 cm<sup>-1</sup> indicates complete deprotonation of the carboxylic groups. While for compound **6**, the vibration band at 1695 cm<sup>-1</sup> was observed, which indicates the incomplete deprotonation of the H<sub>3</sub>BTC ligand.<sup>2</sup> To investigate the thermal stability of these complexes, the thermogravimetric analysis (TGA) experiments were carried out in the temperature range of 30-800 °C under a flow of nitrogen with a heating rate of 10 °C min<sup>-1</sup> (Figure 7). Complex **2** lose little weight before 320 °C, and then decomposes at higher temperature. For complex **3**, the weight loss in the range of 30-240 °C corresponds to the departure of one and a half lattice water molecules (calcd, 5.31%; found, 5.14%), and then the framework undergoes decomposition at about 340 °C. As to **4**, weight loss of 7.66% was observed in the temperature range of 30-267 °C, which corresponds to the release of two lattice water molecules (calcd 7.78%), and then the framework was found to decompose at about 309 °C. Complexes **5** and **6** do not lose any weight before 375 and 340°C, respectively, and then decompose rapidly on further heating.

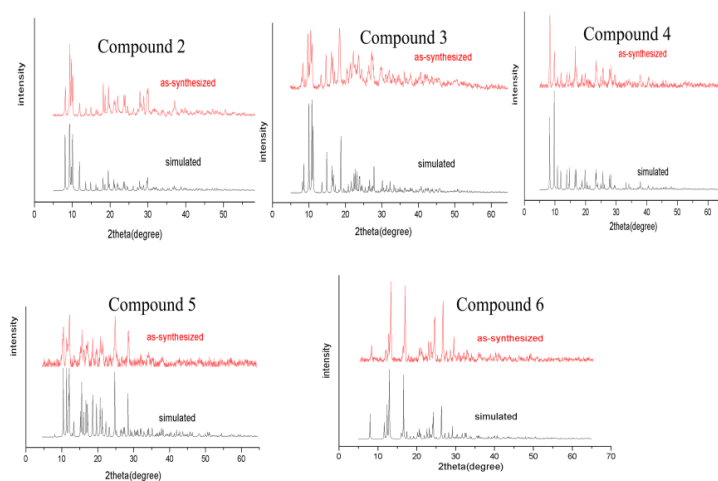

**Figure S1.** PXRD patterns of complexes 2-6.

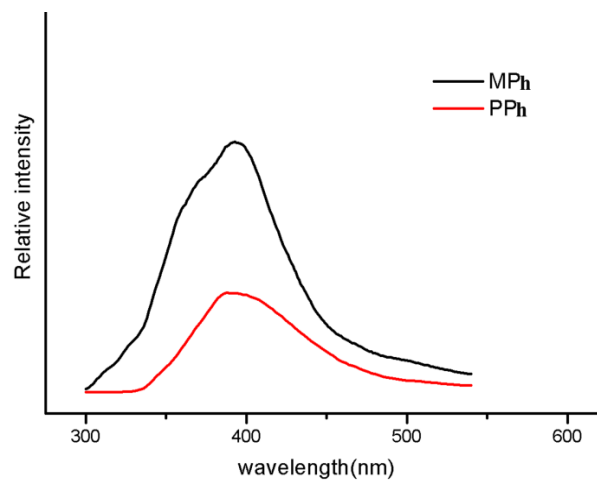

**Figure S2.** Emission spectra of ligands  $H_2MPh$  and  $H_2PPh$  in the solid state at room temperature.

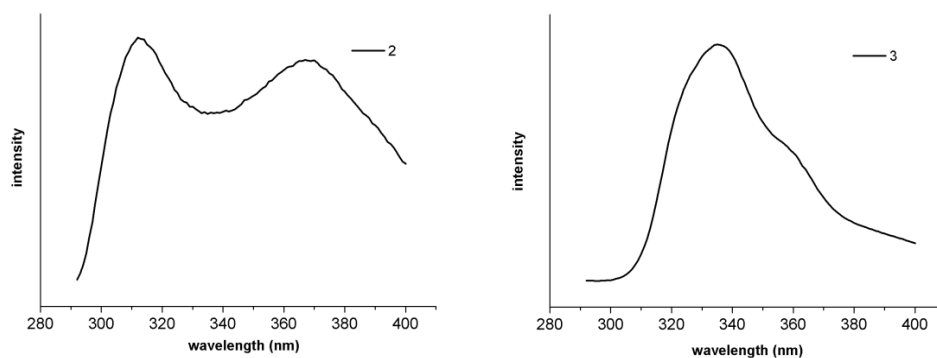

**Figure S3.** Excitation spectra of complexes 2 and 3 in the solid state at room temperature.

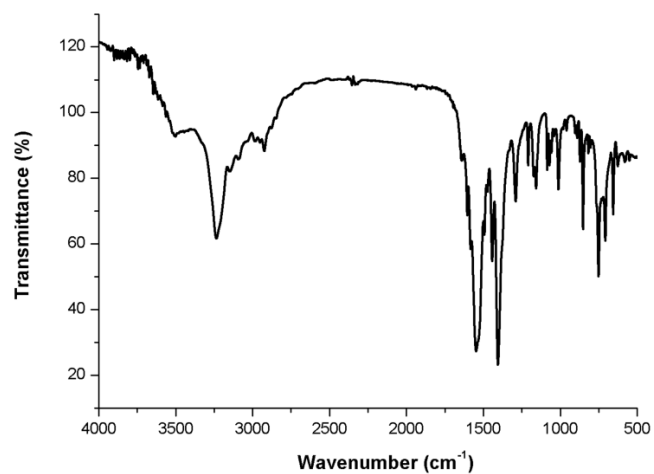

**Figure S4.** The IR spectrum of complex 1.

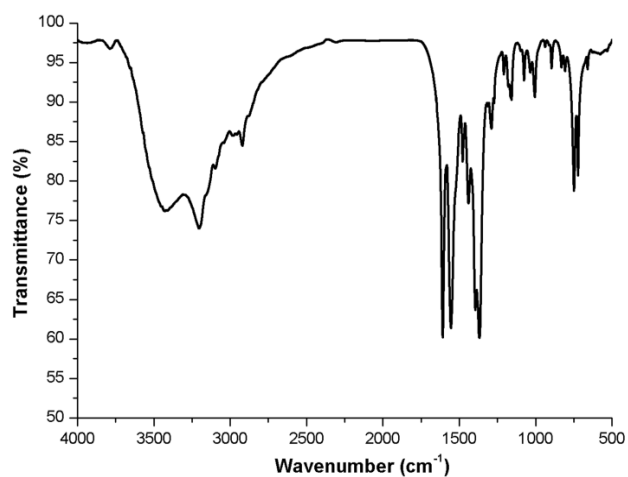

**Figure S5.** The IR spectrum of complex 2.

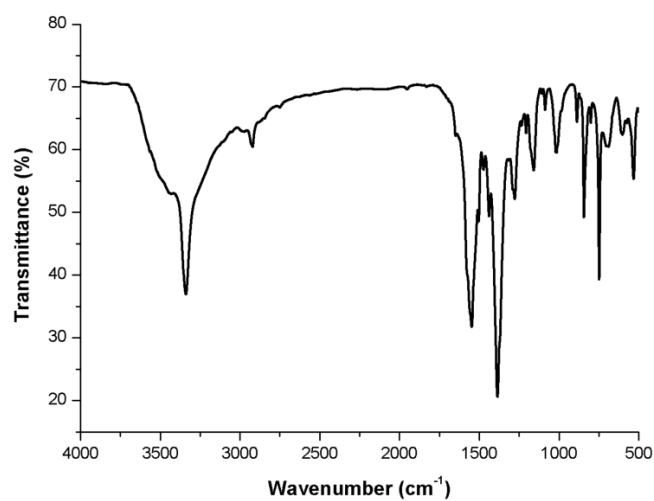

**Figure S6.** The IR spectrum of complex 3.

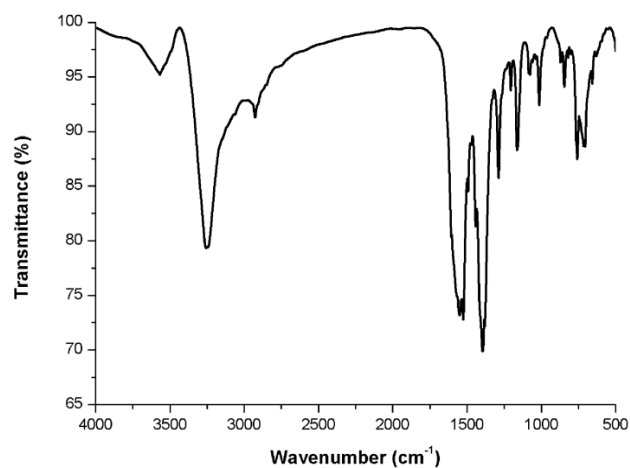

**Figure S7.** The IR spectrum of complex 4.

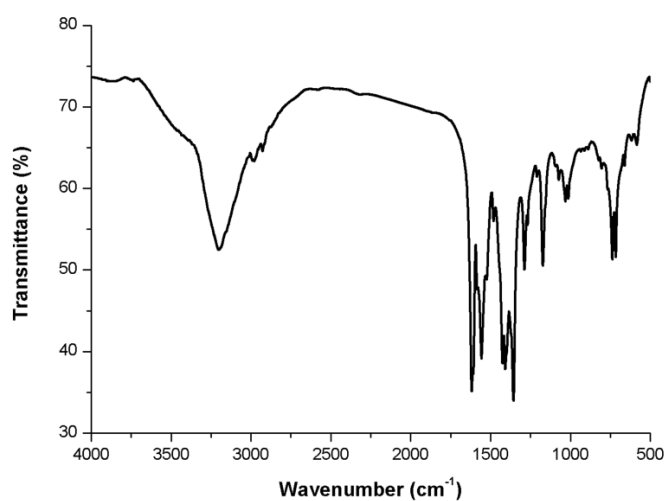

**Figure S8.** The IR spectrum of complex 5.

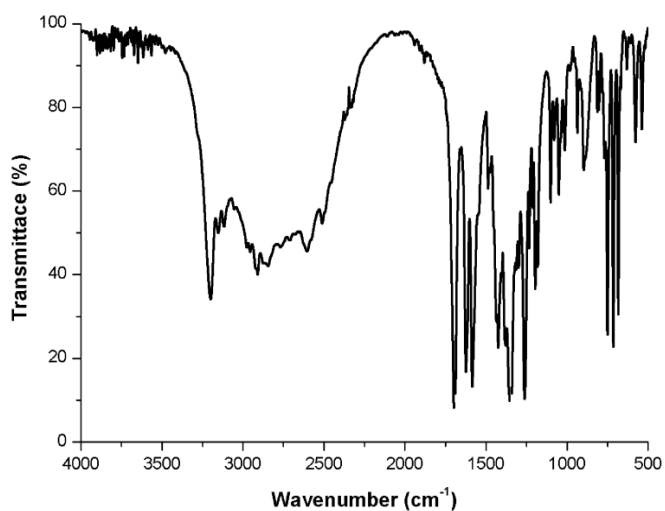

**Figure S9.** The IR spectrum of complex 6.

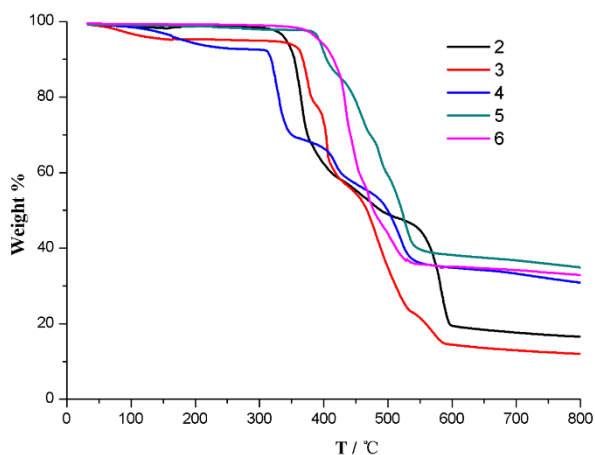

Figure S10. TGA curves for complexes 2-6.

Table S1 Selected Bond Lengths (Å) and Bond Angles (°) for 1

| Bond                | Dist       | Bond              | Dist       |
|---------------------|------------|-------------------|------------|
| Cd(1)-N(1)#1        | 2.268(3)   | Cd(1)-O(4)        | 2.331(3)   |
| Cd(1)-O(1)#2        | 2.260(3)   | Cd(1)-O(3)        | 2.444(3)   |
| Cd(1)-N(3)          | 2.273(3)   | Cd(1)-O(2)#2      | 2.518(3)   |
| Angle               | (°)        | Angle             | (°)        |
| N(1)#1-Cd(1)-O(1)#2 | 114.53(13) | N(3)-Cd(1)-O(4)   | 95.95(13)  |
| N(1)#1-Cd(1)-N(3)   | 107.29(13) | N(1)#1-Cd(1)-O(3) | 82.87(11)  |
| O(1)#2-Cd(1)-N(3)   | 96.44(12)  | O(1)#2-Cd(1)-O(3) | 159.22(12) |
| N(1)#1-Cd(1)-O(4)   | 130.75(12) | N(3)-Cd(1)-O(3)   | 88.44(12)  |
| O(1)#2-Cd(1)-O(4)   | 104.88(12) | N(3)-Cd(1)-O(2)#2 | 148.61(11) |
| O(4)-Cd(1)-O(3)     | 54.43(10)  | O(4)-Cd(1)-O(2)#2 | 83.17(11)  |
| N(1)#1-Cd(1)-O(2)#2 | 96.44(11)  | O(3)-Cd(1)-O(2)#2 | 115.20(11) |

Symmetry codes: #1)  $x-1/2, -y+1/2, z-1/2$ ; #2)  $-x+1/2, y+1/2, -z+1/2$ ;

Table S2 Selected Bond Lengths (Å) and Bond Angles (°) for 2

| Bond                | Dist       | Bond                | Dist       |
|---------------------|------------|---------------------|------------|
| Cd(1)-O(4)#1        | 2.205(4)   | Cd(1)-N(4)          | 2.363(6)   |
| Cd(1)-O(3)          | 2.216(5)   | Cd(1)-O(4)#3        | 2.695(5)   |
| Cd(1)-N(2)#2        | 2.255(5)   |                     |            |
| Angle               | (°)        | Angle               | (°)        |
| O(4)#1-Cd(1)-O(3)   | 132.34(19) | O(4)#1-Cd(1)-O(4)#3 | 75.56(19)  |
| O(4)#1-Cd(1)-N(2)#2 | 114.36(19) | O(3)-Cd(1)-O(4)#3   | 86.50(17)  |
| O(3)-Cd(1)-N(2)#2   | 105.82(19) | N(2)#2-Cd(1)-O(4)#3 | 81.47(19)  |
| O(4)#1-Cd(1)-N(4)   | 107.71(19) | N(4)-Cd(1)-O(4)#3   | 176.82(16) |
| O(3)-Cd(1)-N(4)     | 91.1(2)    | C(19)-O(4)-Cd(1)#4  | 112.0(4)   |
| N(2)#2-Cd(1)-N(4)   | 97.2(2)    | C(12)-O(3)-Cd(1)    | 103.1(4)   |

Symmetry codes: #1)  $x, y-1, z$ ; #2)  $-x+1, -y, -z$   $-x+1, -y+1, -z+1$ .

**Table S3** Selected Bond Lengths (Å) and Bond Angles (°) for **3**

| Bond              | Dist       | Bond              | Dist       |
|-------------------|------------|-------------------|------------|
| Cd(1)-O(4)        | 2.235(6)   | Cd(1)-O(2)        | 2.307(5)   |
| Cd(1)-N(1)#1      | 2.241(7)   | Cd(1)-O(1)        | 2.464(7)   |
| Cd(1)-N(3)        | 2.299(5)   | Cd(1)-O(3)        | 2.710(7)   |
| Angle             | (°)        | Angle             | (°)        |
| O(4)-Cd(1)-N(1)#1 | 124.8(3)   | N(1)#1-Cd(1)-O(2) | 134.21(17) |
| O(4)-Cd(1)-N(3)   | 111.38(19) | O(4)-Cd(1)-N(1)#1 | 124.8(3)   |
| N(1)#1-Cd(1)-N(3) | 100.07(17) | O(4)-Cd(1)-N(3)   | 111.38(19) |
| O(4)-Cd(1)-O(2)   | 95.6(3)    | N(1)#1-Cd(1)-N(3) | 100.07(17) |
| N(3)-Cd(1)-O(2)   | 81.3(2)    | O(4)-Cd(1)-O(2)   | 95.6(3)    |
| O(4)-Cd(1)-O(1)   | 92.52(18)  | N(1)#1-Cd(1)-O(2) | 134.21(17) |
| O(4)-Cd(1)-O(3)   | 51.9(2)    | N(1)#1-Cd(1)-O(3) | 78.8(2)    |
| N(3)-Cd(1)-O(3)   | 101.3(2)   | O(2)-Cd(1)-O(3)   | 146.4(2)   |
| O(1)-Cd(1)-O(3)   | 125.7(2)   |                   |            |

Symmetry codes: #1)  $-x+2, -y, -z+1$ .

**Table S4** Selected Bond Lengths (Å) and Bond Angles (°) for **4**

| Bond                | Dist       | Bond              | Dist       |
|---------------------|------------|-------------------|------------|
| Co(1)-O(3)#1        | 1.994(2)   | Co(1)-N(3)#2      | 2.072(2)   |
| Co(1)-N(1)          | 2.072(2)   | Co(1)-O(2)        | 2.092(2)   |
| Angle               | (°)        | Angle             | (°)        |
| O(3)#1-Co(1)-N(1)   | 99.85(10)  | O(3)#1-Co(1)-O(2) | 101.18(10) |
| O(3)#1-Co(1)-N(3)#2 | 111.61(11) | N(1)-Co(1)-O(2)   | 103.91(10) |
| N(1)-Co(1)-N(3)#2   | 107.19(11) | N(3)#2-Co(1)-O(2) | 129.23(10) |

Symmetry codes: #1)  $-x+1/2, y+1/2, -z+1/2$ ; #2)  $x-1/2, -y+3/2, z-1/2$ .

**Table S5** Selected Bond Lengths (Å) and Bond Angles (°) for **5**

| Bond                | Dist       | Bond              | Dist      |
|---------------------|------------|-------------------|-----------|
| Co(1)-O(4)#1        | 1.9368(19) | Co(1)-N(3)#2      | 2.035(2)  |
| Co(1)-O(2)          | 1.9552(18) | Co(1)-N(2)        | 2.051(2)  |
| Angle               | (°)        | Angle             | (°)       |
| O(4)#1-Co(1)-O(2)   | 130.79(10) | O(4)#1-Co(1)-N(2) | 92.43(9)  |
| O(4)#1-Co(1)-N(3)#2 | 113.54(10) | O(2)-Co(1)-N(2)   | 111.86(9) |
| O(2)-Co(1)-N(3)#2   | 94.74(8)   | N(3)#2-Co(1)-N(2) | 114.77(9) |

Symmetry codes: #1)  $x+1/2, -y+1/2, z+1/2$ ; #2)  $x-1/2, -y+1/2, z-1/2$ .

**Table S6** Selected Bond Lengths (Å) and Bond Angles (°) for **6**

| Bond              | Dist       | Bond                | Dist       |
|-------------------|------------|---------------------|------------|
| Co(1)-O(6)#1      | 1.9244(17) | Co(1)-N(4)          | 1.997(2)   |
| Co(1)-O(4)        | 1.9470(18) | Co(1)-N(3)#2        | 2.0213(19) |
| Angle             | (°)        | Angle               | (°)        |
| O(6)#1-Co(1)-O(4) | 121.31(9)  | O(6)#1-Co(1)-N(3)#2 | 101.59(9)  |

|                   |           |                   |           |
|-------------------|-----------|-------------------|-----------|
| O(6)#1-Co(1)-N(4) | 112.10(8) | O(4)-Co(1)-N(3)#2 | 100.06(8) |
| O(4)-Co(1)-N(4)   | 103.85(8) | N(4)-Co(1)-N(3)#2 | 118.23(8) |

Symmetry codes: #1)  $-x + 1/2, y - 1/2, -z + 1/2$ ; #2)  $-x - 1/2, y - 1/2, -z + 1/2$ .

**Table S7.** Hydrogen bond distance and angle data for **4-6<sup>a</sup>**.

| D-H/A                      | d(H $\cdots$ A)/ Å | D(D $\cdots$ A)/ Å | $\angle$ DHA/ |
|----------------------------|--------------------|--------------------|---------------|
| <b>For 5</b>               |                    |                    |               |
| N(1)-H(1A) $\cdots$ O(1)   | 2.08               | 2.843(3)           | 147           |
| N(4)-H(4A) $\cdots$ O(1)#1 | 1.90               | 2.715(3)           | 157           |
| <b>For 6</b>               |                    |                    |               |
| N1-H1A $\cdots$ O3#2       | 1.94               | 2.796(3)           | 170           |
| N2-H2A $\cdots$ O5#3       | 1.86               | 2.690(3)           | 161           |
| O2-H2E $\cdots$ O1#4       | 1.64(5)            | 2.583(3)           | 161(4)        |

<sup>a</sup> Symmetry transformations to generate equivalent atoms: #1)  $1 - x, 1 - y, 2 - z$ , #2)  $1/2 - x, -1/2 + y, 1/2 - z$ ; #3)  $-1/2 + x, 1/2 - y, 1/2 + z$ , #4)  $-x, 1 + y, 1 - z$ .

Reference:

- (1) P. E. Kruger, P. Moubaraki, G. D. Fallon, K. S. Murray, *J. Chem. Soc. Dalton Trans.*, 2000, 713.  
(2) (a) W. Q. Kan, J. Yang, Y. Y. Liu, J. F. Ma, *Polyhedron*, 2011, **30**, 2113; (b) Y. Y. Liu, J. Li, Ma, J. F.; J. C. Ma, J. Yang, *CrystEngComm*, 2012, **14**, 169.
